# Supplementary material for: Fluorescent molecular rotors based on the BODIPY motif: effect of remote substituents
Source: Royal Society of Chemistry journal article supplement (doi:10.1039/c4pp00204k), 2014-07-28
Supplement: c4pp00204k1.pdf [file c4pp00204k1.pdf]

# Fluorescent Molecular Rotors Based on the BODIPY Motif: Effect of Remote Substituents

*Effat Bahaidarah,<sup>a</sup> Anthony Harriman,<sup>\*a</sup> Patrycja Stachelek,<sup>a</sup> Sandra Rihn,<sup>b</sup> Elodie Heyer,<sup>b</sup> and Raymond Ziessel<sup>b</sup>*

## Supporting Information

<sup>(a)</sup>Molecular Photonics Laboratory, School of Chemistry, Bedson Building, Newcastle University, Newcastle upon Tyne, NE1 7RU, United Kingdom and <sup>(b)</sup>Laboratoire de Chimie Organique et de Spectroscopies Avancées (ICPEES-LCOSA), UMR 7515 CNRS, 25 rue Becquerel, 67087 Strasbourg Cedex 2, France.

### Table of Contents

|                                                                                 |     |
|---------------------------------------------------------------------------------|-----|
| Table S1. Photophysical properties in dichloromethane                           | S2  |
| Tables S2-S6. Cartesian coordinates for the energy-minimized structures         | S3  |
| Table S7. Effect of temperature on the nonradiative rate constant               | S10 |
| Figure S1. Absorption, emission and excitation spectra for ROBOD and BOD        | S11 |
| Figure S2 Absorption, emission and excitation spectra for PHEN1, PHEN2 and CORE | S12 |
| Figure S3 Effect of temperature on emission quantum yields                      | S14 |
| Figure S4 Effect of temperature on emission spectrum of PHEN2                   | S15 |
| Figure S5 Dihedral angle vs energy for PHEN1                                    | S16 |
| Figure S6 Kohn-Sham representations of HOMO and LUMO                            | S17 |
| Figure S7 Energy-minimized geometries                                           | S19 |
| Experimental details                                                            | S25 |
| References                                                                      | S26 |

**Table S1.** Summary of the photophysical properties recorded for the target compounds in CH<sub>2</sub>Cl<sub>2</sub> at 20 °C.

| Property                                              | ROBO   | BOD    | PHEN1  | PHEN2  | CORE   |
|-------------------------------------------------------|--------|--------|--------|--------|--------|
| $\lambda_{\text{MAX}} / \text{nm}$                    | 502    | 525    | 531    | 559    | 547    |
| $\epsilon_{\text{MAX}} / \text{M}^{-1}\text{cm}^{-1}$ | 71,000 | 74,000 | 59,100 | 62,235 | 62,100 |
| $\lambda_{\text{FLU}} / \text{nm}$                    | 528    | 544    | 557    | 597    | 582    |
| SS / cm <sup>-1</sup>                                 | 980    | 665    | 880    | 1,140  | 1,100  |
| $\Phi_{\text{F}}$                                     | 0.021  | 0.77   | 0.010  | 0.24   | 0.87   |
| $\tau_{\text{S}} / \text{ns}$                         | 0.16   | 5.4    | 0.07   | 2.06   | 6.4    |
| $k_{\text{RAD}} / 10^8 \text{ s}^{-1}$                | 1.31   | 1.43   | 1.43   | 1.16   | 1.36   |
| $k_{\text{NR}} / 10^8 \text{ s}^{-1}$                 | 61     | 0.43   | 141    | 3.7    | 0.20   |

**Table S2.** Cartesian coordinates for the energy-minimized structure computed for ROBOD.

|    |   |            |             |             |
|----|---|------------|-------------|-------------|
| 1  | F | 0.00000000 | 0.00000000  | 0.00000000  |
| 2  | B | 1.34650430 | 0.00000000  | 0.00000000  |
| 3  | N | 1.92517201 | 1.54095207  | 0.00000000  |
| 4  | C | 1.63589047 | 2.51296118  | -0.93028897 |
| 5  | C | 2.32607996 | 3.73531058  | -0.56524957 |
| 6  | C | 3.03522730 | 3.46733445  | 0.60941029  |
| 7  | C | 2.77552869 | 2.08603808  | 0.94760006  |
| 8  | C | 3.26793204 | 1.30882879  | 2.11918166  |
| 9  | C | 4.15111451 | 1.97501910  | 3.06040252  |
| 10 | C | 3.87994511 | 1.93591110  | 4.43600445  |
| 11 | C | 4.73321917 | 2.56350855  | 5.34062328  |
| 12 | C | 5.87357835 | 3.23744818  | 4.89119303  |
| 13 | C | 6.77310855 | 3.91702996  | 5.85141807  |
| 14 | C | 6.14682486 | 3.27404136  | 3.51815120  |
| 15 | C | 5.29339870 | 2.65427071  | 2.61036947  |
| 16 | F | 1.75167684 | -0.65779598 | -1.10295281 |
| 17 | N | 1.95479642 | -0.64389872 | 1.34932714  |
| 18 | C | 2.84181174 | 0.02749982  | 2.25792585  |
| 19 | C | 3.17096764 | -0.95081185 | 3.31748233  |
| 20 | C | 2.49582908 | -2.12253466 | 3.02166906  |
| 21 | C | 1.75509689 | -1.90230722 | 1.79814185  |
| 22 | H | 0.98238600 | 2.32795732  | -1.78765923 |
| 23 | H | 2.27700395 | 4.66624311  | -1.12535946 |
| 24 | H | 3.66790365 | 4.13935352  | 1.18387588  |
| 25 | H | 2.98436322 | 1.40851566  | 4.80071451  |
| 26 | H | 4.50819514 | 2.52635252  | 6.41798561  |
| 27 | H | 6.46297979 | 4.98619764  | 5.97099186  |
| 28 | H | 6.73242159 | 3.42752755  | 6.85558831  |
| 29 | H | 7.83077957 | 3.89945047  | 5.48959164  |
| 30 | H | 7.04448310 | 3.79772696  | 3.15389121  |
| 31 | H | 5.51878708 | 2.69049330  | 1.53291027  |
| 32 | H | 3.83547317 | -0.73038432 | 4.14940298  |
| 33 | H | 2.49570591 | -3.05816725 | 3.57670040  |
| 34 | H | 1.11604734 | -2.62005813 | 1.27165789  |

**Table S3.** Cartesian coordinates for the energy-minimized structure computed for BOD.

|    |   |             |             |             |
|----|---|-------------|-------------|-------------|
| 1  | F | 0.00000000  | 0.00000000  | 0.00000000  |
| 2  | B | 1.38454428  | 0.00000000  | 0.00000000  |
| 3  | N | 1.92656069  | 1.45989241  | 0.00000000  |
| 4  | C | 1.65913173  | 2.46449187  | -0.87307672 |
| 5  | C | 0.75180865  | 2.37916312  | -2.03201102 |
| 6  | C | 2.39897110  | 3.64193356  | -0.46966986 |
| 7  | C | 2.37473469  | 4.94059805  | -1.19462716 |
| 8  | C | 3.40733382  | 4.98040715  | -2.32223938 |
| 9  | C | 3.12807103  | 3.31653182  | 0.67158598  |
| 10 | C | 4.03365671  | 4.20516133  | 1.42015816  |
| 11 | C | 2.83888326  | 1.93260355  | 0.99952054  |
| 12 | C | 3.27250467  | 1.10851492  | 2.04108486  |
| 13 | C | 4.21816852  | 1.65492438  | 3.04883661  |
| 14 | C | 5.60053701  | 1.53616816  | 2.84340643  |
| 15 | C | 6.48569452  | 2.05244357  | 3.79345335  |
| 16 | C | 5.99601717  | 2.68256617  | 4.94197859  |
| 17 | C | 4.61688463  | 2.79854085  | 5.14365944  |
| 18 | C | 3.72328176  | 2.28612275  | 4.19952720  |
| 19 | F | 1.72399759  | -0.63791265 | -1.18202301 |
| 20 | N | 1.93181203  | -0.79685306 | 1.21975804  |
| 21 | C | 2.83799906  | -0.21441148 | 2.16490714  |
| 22 | C | 3.12752937  | -1.24284625 | 3.14595256  |
| 23 | C | 4.02263592  | -1.09602979 | 4.30675707  |
| 24 | C | 2.40700285  | -2.38140844 | 2.79042999  |
| 25 | C | 2.37733526  | -3.69448220 | 3.48871347  |
| 26 | C | 3.39987004  | -4.67148646 | 2.90614715  |
| 27 | C | 1.66983722  | -2.07922492 | 1.58263858  |
| 28 | C | 0.77460992  | -3.01039813 | 0.87185431  |
| 29 | H | 1.20141045  | 2.84604191  | -2.92521676 |
| 30 | H | -0.19144692 | 2.91879751  | -1.83291671 |
| 31 | H | 0.46986116  | 1.35522447  | -2.31940143 |
| 32 | H | 1.36000677  | 5.13001843  | -1.60510652 |
| 33 | H | 2.56472887  | 5.77499957  | -0.48520371 |
| 34 | H | 3.22641002  | 4.19209475  | -3.06217823 |
| 35 | H | 3.38534983  | 5.94093856  | -2.84864771 |
| 36 | H | 4.42372051  | 4.83470543  | -1.93710674 |
| 37 | H | 4.10973437  | 5.20548282  | 0.96642568  |
| 38 | H | 3.70280818  | 4.34551433  | 2.46248583  |
| 39 | H | 5.05689509  | 3.79709275  | 1.46883006  |
| 40 | H | 5.98154028  | 1.04406378  | 1.94757917  |
| 41 | H | 7.56157031  | 1.96258818  | 3.63694008  |
| 42 | H | 6.69030098  | 3.08376338  | 5.68118743  |
| 43 | H | 4.23595804  | 3.29010370  | 6.03993360  |
| 44 | H | 2.64751261  | 2.37668283  | 4.35568898  |
| 45 | H | 5.05065857  | -0.84124179 | 3.99976820  |
| 46 | H | 3.68936173  | -0.29161184 | 4.98292532  |
| 47 | H | 4.08726538  | -2.01767126 | 4.90572717  |

|      |             |             |             |
|------|-------------|-------------|-------------|
| 48 H | 2.57331428  | -3.55232733 | 4.57357449  |
| 49 H | 1.35910048  | -4.13474073 | 3.42931173  |
| 50 H | 4.42124695  | -4.28481421 | 3.00496648  |
| 51 H | 3.35966200  | -5.64042309 | 3.41561882  |
| 52 H | 3.22429040  | -4.84988448 | 1.83885156  |
| 53 H | 1.25972168  | -3.99054260 | 0.72244067  |
| 54 H | -0.14332829 | -3.19768970 | 1.45725929  |
| 55 H | 0.44696332  | -2.66634319 | -0.12025127 |

**Table S4.** Cartesian coordinates for the energy-minimized structure computed for PHEN1.

|    |   |             |             |             |
|----|---|-------------|-------------|-------------|
| 1  | C | 0.00000000  | 0.00000000  | 0.00000000  |
| 2  | C | 1.48073442  | 0.00000000  | 0.00000000  |
| 3  | C | 2.18958051  | 1.20734209  | 0.00000000  |
| 4  | C | 3.58206725  | 1.21032059  | 0.01252732  |
| 5  | C | 2.18991068  | -1.20688929 | 0.00956846  |
| 6  | C | 3.58258845  | -1.20906138 | 0.01894450  |
| 7  | C | 4.28980106  | 0.00070981  | 0.02010641  |
| 8  | C | 5.74548853  | -0.00328012 | 0.03310818  |
| 9  | C | 6.52762139  | -0.01337187 | -1.07563442 |
| 10 | C | 6.16955026  | 0.17258138  | -2.49575392 |
| 11 | C | 7.34487304  | 0.10543494  | -3.22662824 |
| 12 | C | 8.42733191  | -0.13998101 | -2.29568528 |
| 13 | N | 7.94873412  | -0.19596581 | -1.02864087 |
| 14 | B | 8.73051723  | -0.75026510 | 0.27660447  |
| 15 | F | 8.93934261  | -2.07828276 | 0.19648222  |
| 16 | F | 9.92270995  | -0.14504492 | 0.42017360  |
| 17 | C | 6.43073245  | 0.02772638  | 1.35473884  |
| 18 | N | 7.71658045  | -0.40021048 | 1.54618770  |
| 19 | C | 8.04177828  | -0.17554640 | 2.90201418  |
| 20 | C | 9.25635009  | -0.48925092 | 3.58339193  |
| 21 | C | 9.54017396  | 0.16616734  | 4.80625512  |
| 22 | C | 10.68881905 | -0.13497990 | 5.52127532  |
| 23 | C | 11.59351934 | -1.09814594 | 5.04996969  |
| 24 | C | 12.82484677 | -1.40630960 | 5.81118274  |
| 25 | C | 11.32005252 | -1.75226863 | 3.84356182  |
| 26 | C | 10.17333694 | -1.45356020 | 3.11751331  |
| 27 | C | 6.87843498  | 0.41237670  | 3.54858241  |
| 28 | C | 5.88093247  | 0.54393059  | 2.58262641  |
| 29 | H | -0.38054806 | 0.01135203  | 1.05300693  |
| 30 | H | -0.40081732 | 0.90216736  | -0.52464371 |
| 31 | H | -0.40114249 | -0.91301218 | -0.50526065 |
| 32 | H | 1.64163842  | 2.16243739  | -0.01050463 |
| 33 | H | 4.12916508  | 2.16558566  | 0.01467646  |
| 34 | H | 1.64251116  | -2.16234936 | 0.00741396  |
| 35 | H | 4.12995683  | -2.16419055 | 0.02394654  |
| 36 | H | 5.15332476  | 0.34411664  | -2.84097872 |
| 37 | H | 7.47590439  | 0.21078831  | -4.30182169 |
| 38 | H | 9.48986103  | -0.26903470 | -2.53008088 |
| 39 | H | 8.84867330  | 0.93364297  | 5.18950012  |
| 40 | H | 10.89475224 | 0.38643714  | 6.46988110  |
| 41 | H | 13.66006672 | -0.74821506 | 5.46011707  |
| 42 | H | 12.67589969 | -1.22881124 | 6.90482821  |
| 43 | H | 13.13235362 | -2.47074013 | 5.66151088  |
| 44 | H | 12.02061896 | -2.51377751 | 3.46491270  |
| 45 | H | 9.98052919  | -1.98675317 | 2.17249668  |
| 46 | H | 6.81674403  | 0.66555854  | 4.60527809  |
| 47 | H | 4.87238646  | 0.93263131  | 2.69600761  |

**Table S5.** Cartesian coordinates for the energy-minimized structure computed for PHEN2.

|    |   |             |             |             |
|----|---|-------------|-------------|-------------|
| 1  | C | 0.00000000  | 0.00000000  | 0.00000000  |
| 2  | C | 1.48062548  | 0.00000000  | 0.00000000  |
| 3  | C | 2.19122179  | 1.20594020  | 0.00000000  |
| 4  | C | 3.58330818  | 1.20572455  | 0.01317285  |
| 5  | C | 2.18902494  | -1.20763805 | 0.01419246  |
| 6  | C | 3.58107989  | -1.21215717 | 0.02391622  |
| 7  | C | 4.29402609  | -0.00446655 | 0.01645985  |
| 8  | C | 5.74748202  | 0.01084942  | 0.04035279  |
| 9  | C | 6.49596347  | -0.68793337 | -1.03016178 |
| 10 | C | 5.98578127  | -1.69822927 | -1.92900111 |
| 11 | C | 7.05407168  | -2.09617583 | -2.72784533 |
| 12 | C | 8.21912147  | -1.32135717 | -2.32487178 |
| 13 | C | 9.49666611  | -1.44337170 | -2.94705483 |
| 14 | C | 9.79944843  | -2.64061435 | -3.64386423 |
| 15 | C | 11.01416795 | -2.79689144 | -4.29087061 |
| 16 | C | 11.97086213 | -1.76945916 | -4.27737378 |
| 17 | C | 13.27138634 | -1.94830726 | -4.95924362 |
| 18 | C | 11.67794839 | -0.58089909 | -3.59823017 |
| 19 | C | 10.46532610 | -0.41802614 | -2.94032589 |
| 20 | N | 7.82225940  | -0.45939068 | -1.27888971 |
| 21 | B | 8.76796091  | 0.51709736  | -0.32314140 |
| 22 | F | 9.92916359  | -0.09321509 | -0.03154712 |
| 23 | F | 9.03355369  | 1.66611011  | -0.97510812 |
| 24 | C | 6.45997435  | 0.64439340  | 1.01144000  |
| 25 | N | 7.88266571  | 0.79079807  | 1.01050740  |
| 26 | C | 8.24494993  | 1.39141310  | 2.18543609  |
| 27 | C | 9.57281697  | 1.73211885  | 2.65865407  |
| 28 | C | 10.57224045 | 2.23381457  | 1.81511832  |
| 29 | C | 11.81885287 | 2.58413561  | 2.32980959  |
| 30 | C | 12.09383594 | 2.43669229  | 3.69270187  |
| 31 | C | 13.42561684 | 2.79087022  | 4.23440489  |
| 32 | C | 11.09446162 | 1.93700036  | 4.53857046  |
| 33 | C | 9.84768439  | 1.59036545  | 4.03144953  |
| 34 | C | 7.05074891  | 1.65302241  | 2.98841029  |
| 35 | C | 5.95527804  | 1.22241827  | 2.27342223  |
| 36 | H | -0.38010367 | -0.01493380 | 1.05313293  |
| 37 | H | -0.40156341 | 0.91436568  | -0.50243038 |
| 38 | H | -0.40037197 | -0.90076526 | -0.52751237 |
| 39 | H | 1.64512941  | 2.16225805  | -0.00811142 |
| 40 | H | 4.13353660  | 2.15954095  | 0.02183647  |
| 41 | H | 1.64032115  | -2.16252289 | 0.02004213  |
| 42 | H | 4.12371730  | -2.17012205 | 0.05308208  |
| 43 | H | 4.95721050  | -2.04811044 | -1.96014632 |
| 44 | H | 7.04354867  | -2.82642408 | -3.53502222 |
| 45 | H | 9.06751775  | -3.46413684 | -3.65994218 |
| 46 | H | 11.23431884 | -3.73687089 | -4.82214257 |
| 47 | H | 14.00578865 | -2.41567679 | -4.25444893 |

|      |             |             |             |
|------|-------------|-------------|-------------|
| 48 H | 13.16874933 | -2.61699697 | -5.84948550 |
| 49 H | 13.68704007 | -0.96659582 | -5.29602691 |
| 50 H | 12.41646973 | 0.23684279  | -3.58670700 |
| 51 H | 10.26027069 | 0.53133453  | -2.41979055 |
| 52 H | 10.37752258 | 2.35311681  | 0.73698349  |
| 53 H | 12.59368710 | 2.98019778  | 1.65458083  |
| 54 H | 14.10004446 | 1.89786209  | 4.19672773  |
| 55 H | 13.89693868 | 3.60940486  | 3.63630297  |
| 56 H | 13.34956096 | 3.12573741  | 5.29830430  |
| 57 H | 11.29870132 | 1.81865317  | 5.61442392  |
| 58 H | 9.07195705  | 1.19640277  | 4.70750514  |
| 59 H | 7.07681899  | 2.11982086  | 3.97171107  |
| 60 H | 4.89963849  | 1.25581612  | 2.53388963  |



**Table S6.** Cartesian coordinates for the energy-minimized structure computed for CORE.

|    |   |             |             |             |
|----|---|-------------|-------------|-------------|
| 1  | F | 0.00000000  | 0.00000000  | 0.00000000  |
| 2  | B | 1.45320577  | 0.00000000  | 0.00000000  |
| 3  | F | 2.03842669  | 1.32117097  | 0.00000000  |
| 4  | N | 1.52216206  | -0.99424402 | 1.18395382  |
| 5  | C | 0.76083351  | -0.86532414 | 2.27545205  |
| 6  | C | -0.25731286 | 0.20705698  | 2.30638049  |
| 7  | C | -0.99958145 | 0.48953658  | 1.10682856  |
| 8  | C | -1.94028085 | 1.54940718  | 1.08308180  |
| 9  | C | -2.17190184 | 2.33159535  | 2.21973034  |
| 10 | C | -1.46091239 | 2.06659422  | 3.40925173  |
| 11 | C | -0.52430566 | 1.02793662  | 3.44502802  |
| 12 | C | 1.11310134  | -1.97255259 | 3.16301830  |
| 13 | C | 2.05231545  | -2.79840296 | 2.55492708  |
| 14 | C | 2.66672155  | -4.03516352 | 3.08708627  |
| 15 | C | 2.31182371  | -2.17837433 | 1.22721707  |
| 16 | C | 2.99456581  | -2.50663582 | 0.07264962  |
| 17 | C | 3.03891428  | -1.75063908 | -1.14358962 |
| 18 | C | 3.71957354  | -1.83077799 | -2.41926770 |
| 19 | C | 4.57229910  | -2.92545284 | -2.93182640 |
| 20 | C | 3.37981729  | -0.62215689 | -3.09046773 |
| 21 | C | 2.53717426  | 0.18028043  | -2.26482614 |
| 22 | C | 1.97295052  | 1.54901537  | -2.32431838 |
| 23 | C | 1.33298530  | 2.09929447  | -3.47498027 |
| 24 | C | 0.77549518  | 3.38509654  | -3.48134426 |
| 25 | C | 0.82939576  | 4.18044624  | -2.32025516 |
| 26 | C | 1.44740458  | 3.67856387  | -1.16697649 |
| 27 | C | 2.01743476  | 2.38390448  | -1.15340240 |
| 28 | N | 2.33082684  | -0.54756678 | -1.13044462 |
| 29 | H | -1.04909965 | -0.26214704 | 0.20726942  |
| 30 | H | -2.49546367 | 1.75501296  | 0.14923197  |
| 31 | H | -2.91899421 | 3.14702819  | 2.19504747  |
| 32 | H | -1.64090018 | 2.67860381  | 4.31149746  |
| 33 | H | 0.04235867  | 0.85480464  | 4.38078855  |
| 34 | H | 0.66242539  | -2.12133432 | 4.15628723  |
| 35 | H | 2.31506973  | -4.30808296 | 4.10532213  |
| 36 | H | 2.46494544  | -4.92815814 | 2.45607495  |
| 37 | H | 3.77412841  | -3.97022464 | 3.16463139  |
| 38 | H | 3.58095239  | -3.45152969 | 0.08489954  |
| 39 | H | 3.99316411  | -3.71186325 | -3.46877484 |
| 40 | H | 5.34392331  | -2.58992254 | -3.66022756 |
| 41 | H | 5.13838302  | -3.47390181 | -2.14701499 |
| 42 | H | 3.74178626  | -0.32955387 | -4.08884642 |
| 43 | H | 1.25585788  | 1.48837159  | -4.39629640 |
| 44 | H | 0.29101730  | 3.77292025  | -4.39618415 |
| 45 | H | 0.39629124  | 5.19824885  | -2.32396019 |
| 46 | H | 1.49109134  | 4.29837692  | -0.25197622 |
| 47 | H | 2.71271043  | 2.15099271  | -0.23188535 |

**Table S7.** Effect of temperature on the nonradiative rate constant. The rate constants are expressed in units of  $10^9 \text{ s}^{-1}$ .

| Temperature / K | CORE   | BOD    | PHEN2  | ROBOD | PHEN1 |
|-----------------|--------|--------|--------|-------|-------|
| 140             | 0.0085 | 0.0195 | 0.0015 | 0.022 | 0.030 |
| 150             | 0.0120 | 0.0210 | 0.0170 | 0.065 | 0.12  |
| 160             | 0.0107 | 0.0190 | 0.0480 | 0.174 | 0.35  |
| 170             | 0.0100 | 0.0170 | 0.0850 | 0.395 | 0.71  |
| 180             | 0.0100 | 0.0175 | 0.1060 | 0.616 | 1.20  |
| 190             | 0.0130 | 0.0170 | 0.1315 | 1.116 | 1.71  |
| 200             | 0.0140 | 0.0170 | 0.1335 | 1.438 | 2.43  |
| 210             | 0.0120 | 0.0185 | 0.1560 | 1.806 | 3.18  |
| 220             | 0.0120 | 0.0230 | 0.1610 | 2.20  | 4.00  |
| 230             | 0.0140 | 0.0210 | 0.2000 | 2.75  | 4.90  |
| 240             | 0.0096 | 0.0230 | 0.2080 | 3.22  | 6.28  |
| 250             | 0.0115 | 0.0245 | 0.2360 | 4.03  | 7.10  |
| 260             | 0.0125 | 0.0305 | 0.2630 | 4.19  | 8.37  |
| 270             | 0.0130 | 0.0370 | 0.2860 | 5.08  | 9.60  |
| 280             | 0.0090 | 0.0460 | 0.3335 | 6.34  | 10.10 |
| 290             | 0.0120 | 0.0520 | 0.3430 | 6.50  | 10.73 |

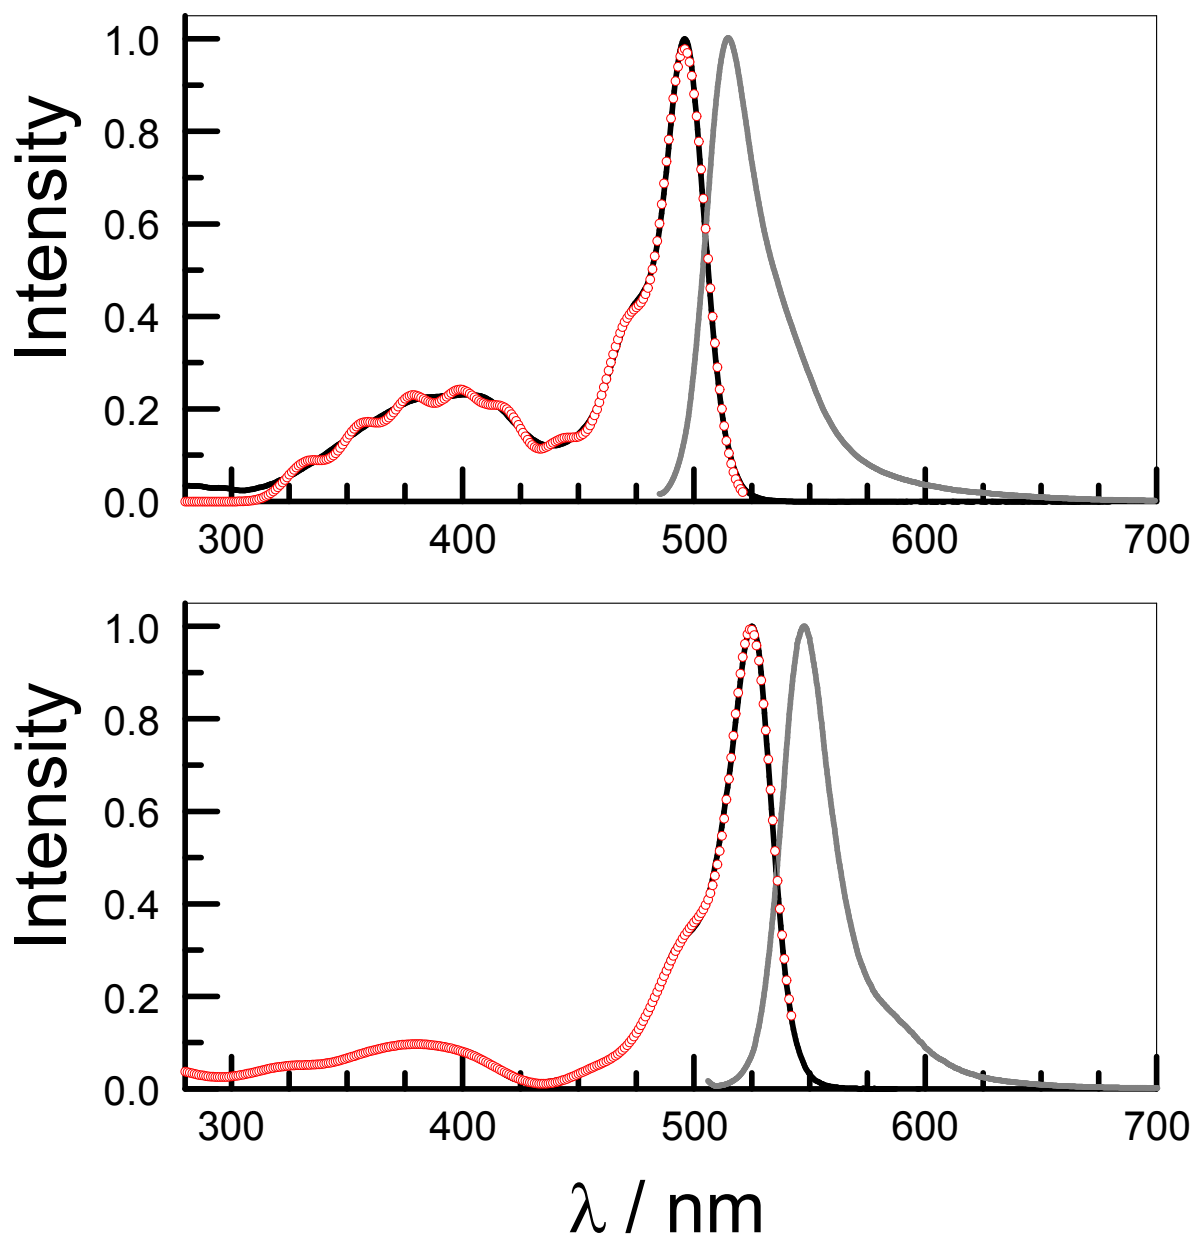

**Figure S1.** Comparison of absorption (black curve), fluorescence (grey curve) and excitation (red circles) spectra recorded for ROBOD (upper panel) and BOD (lower panel) in MTHF at room temperature.

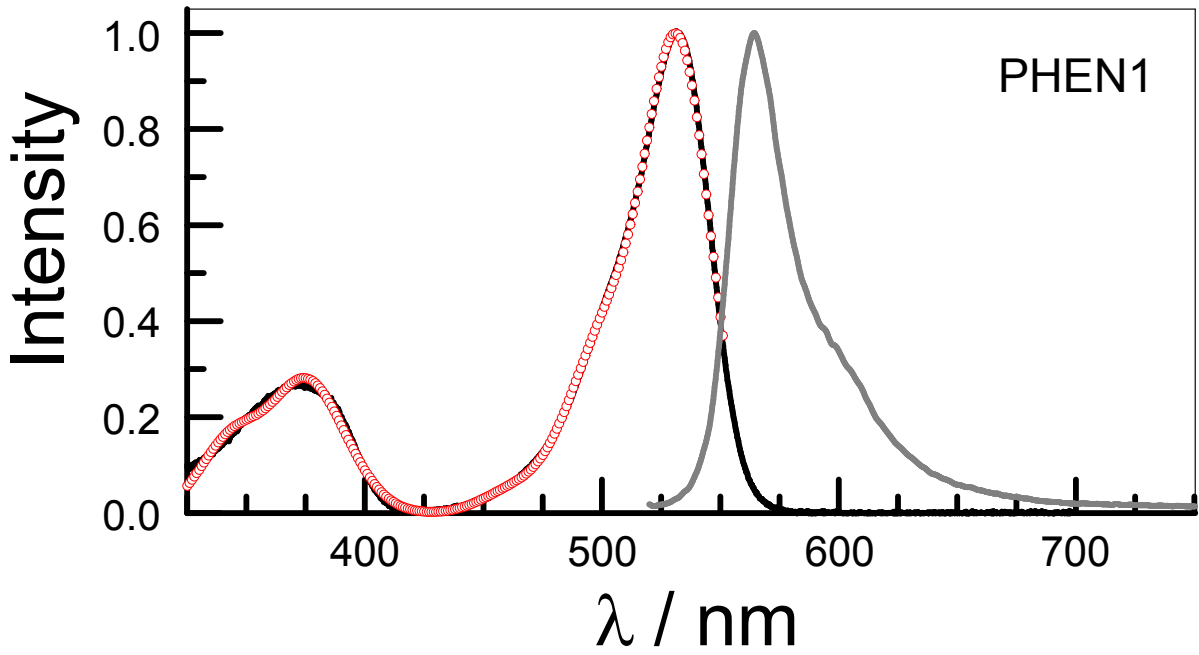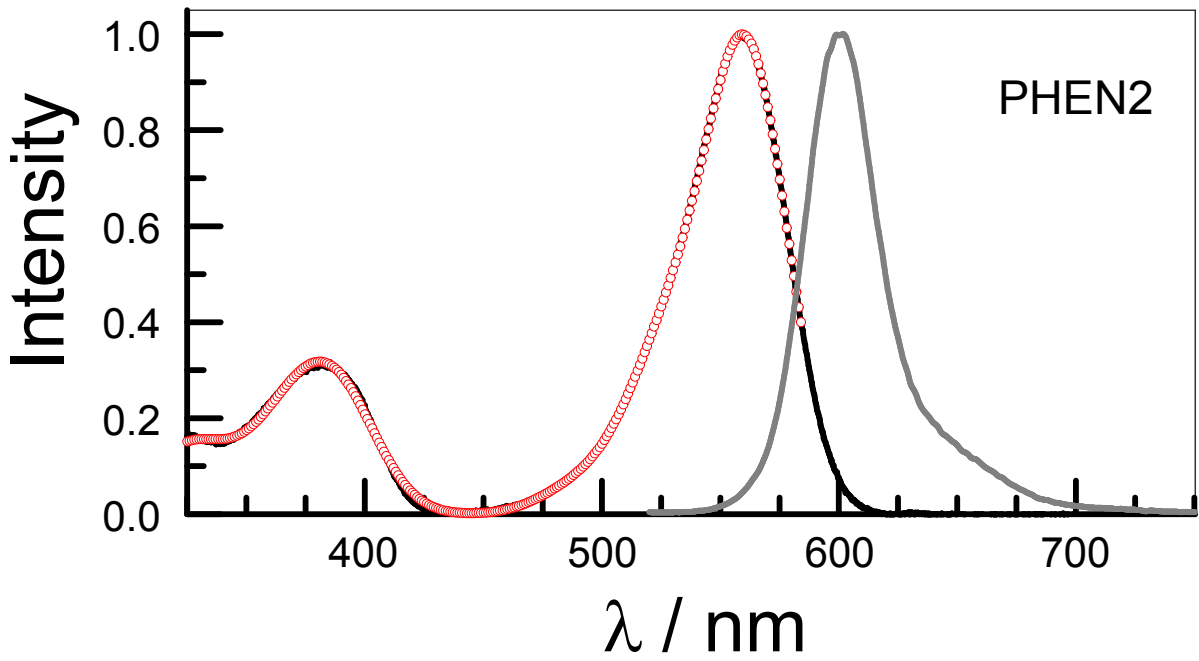

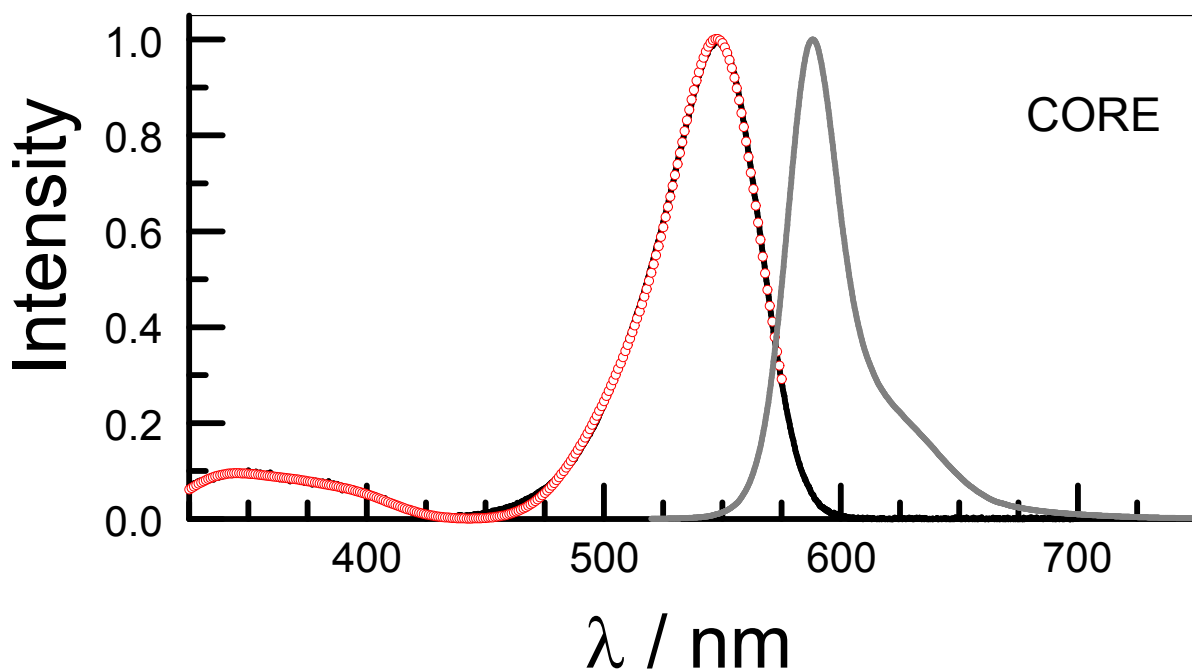

**Figure S2.** Comparison of absorption (black curve), fluorescence (grey curve) and excitation (red circles) spectra recorded for the Bodipy-based dyes in MTHF at room temperature.

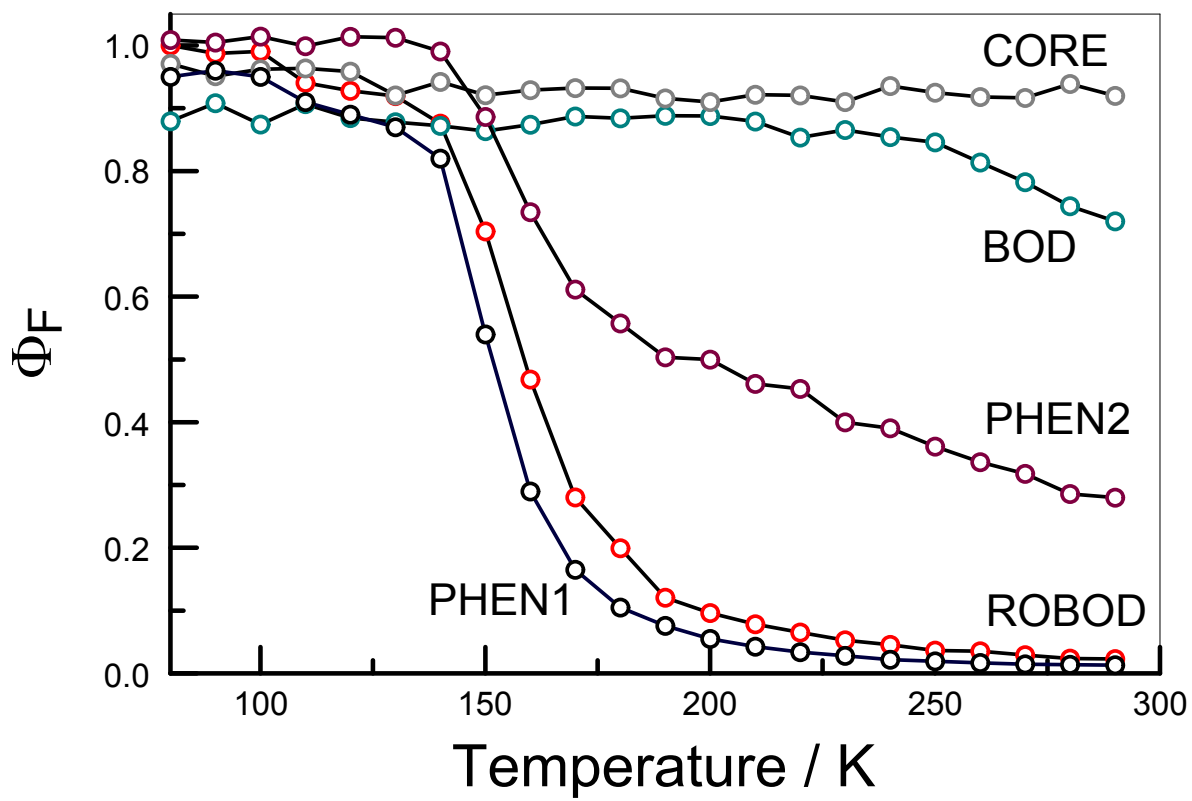

**Figure S3.** Effect of temperature on the emission quantum yield measured for the various Bodipy-based dyes in MTHF solution.

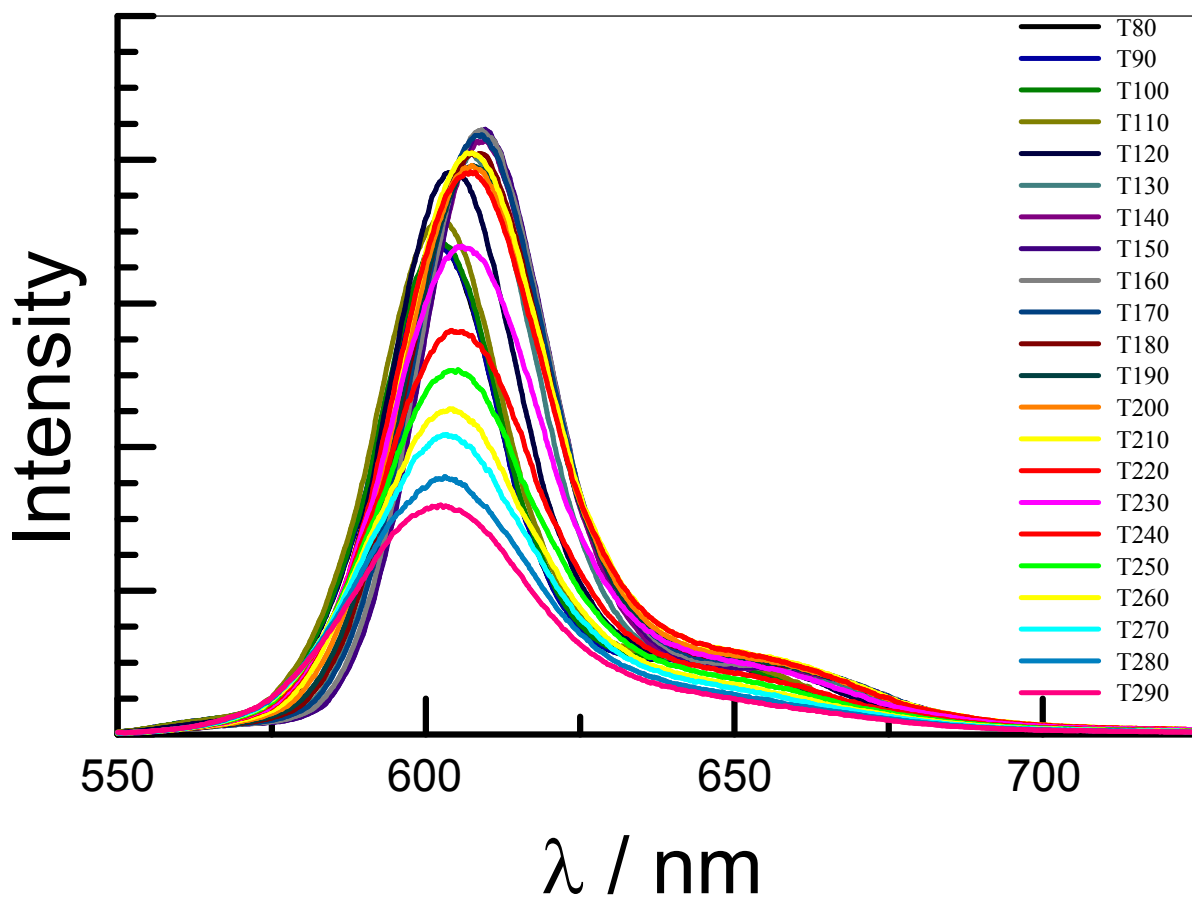

**Figure S4.** Effect of temperature on the fluorescence spectral profile recorded for PHEN2 in MTHF.

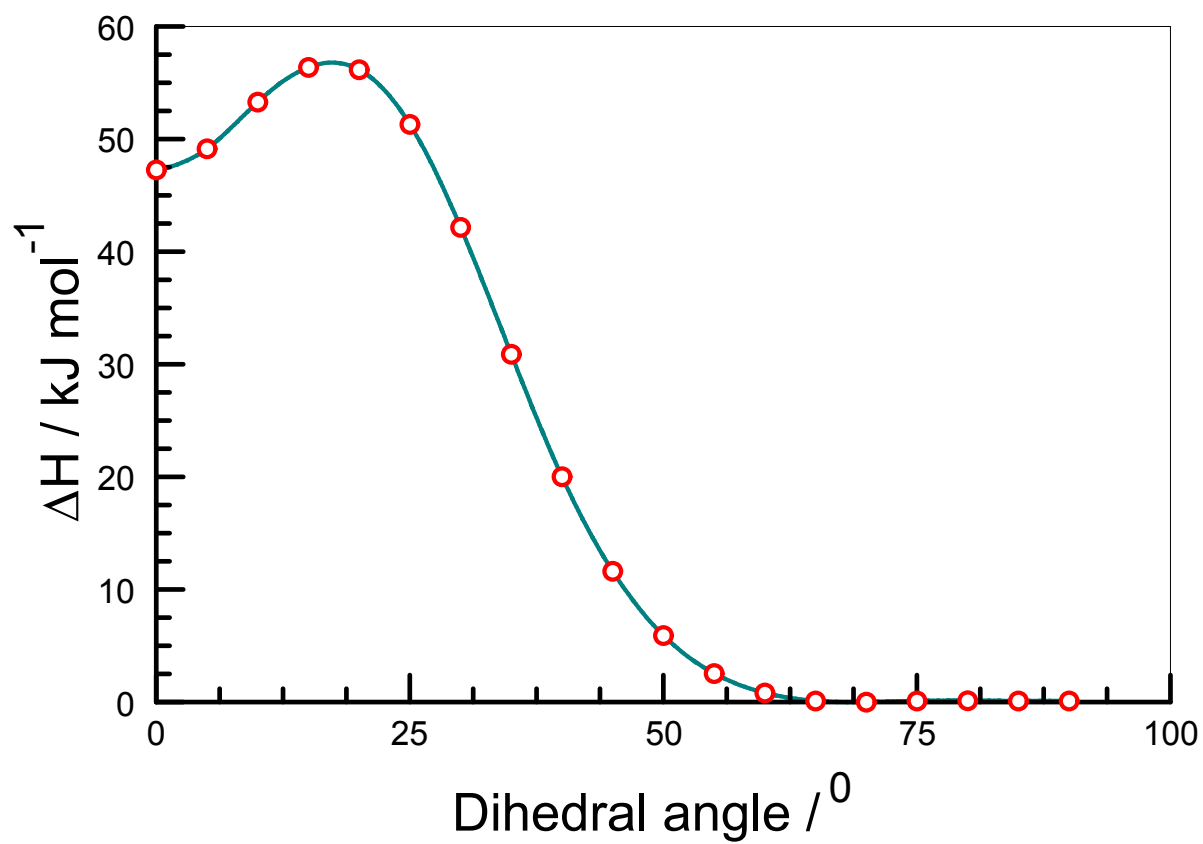

**Figure S5.** Effect of dihedral angle between the dipyrin nucleus and the 2-tolyl ring on the total enthalpy of the molecule as computed for PHEN1 in a solvent reservoir.



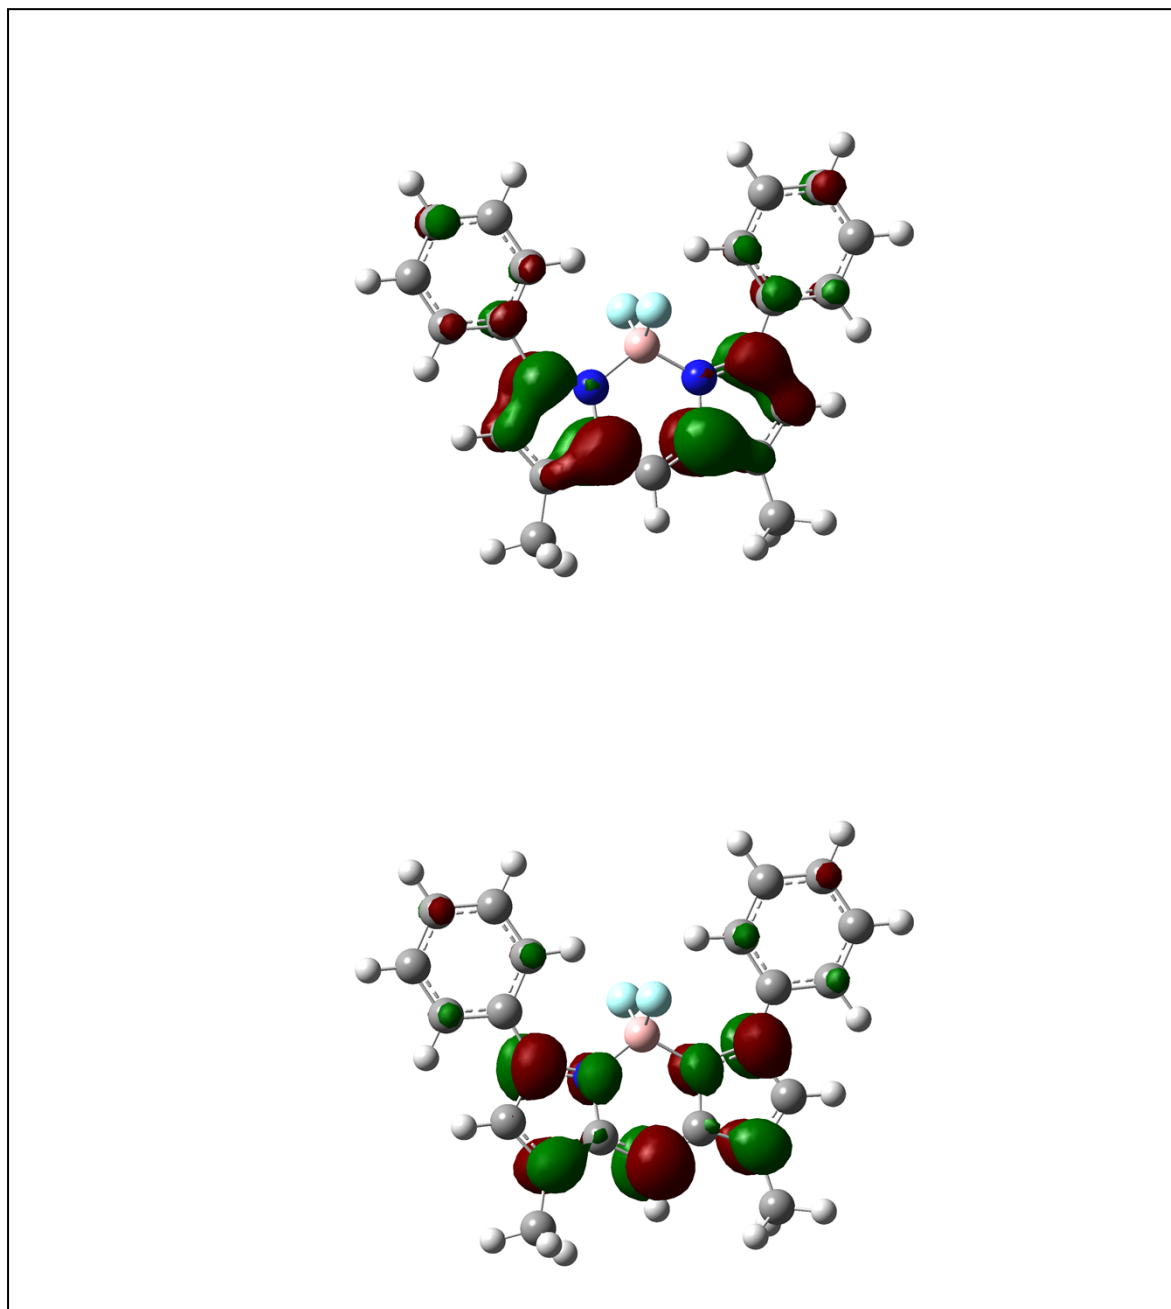

**Figure S6a.** Kohn-Sham representations of the HOMO (upper panel) and LUMO (lower panel) isodensity ( $id = 0.02$ ) distributions computed for CORE with the 3,5-aryl rings held at a co-planar geometry.

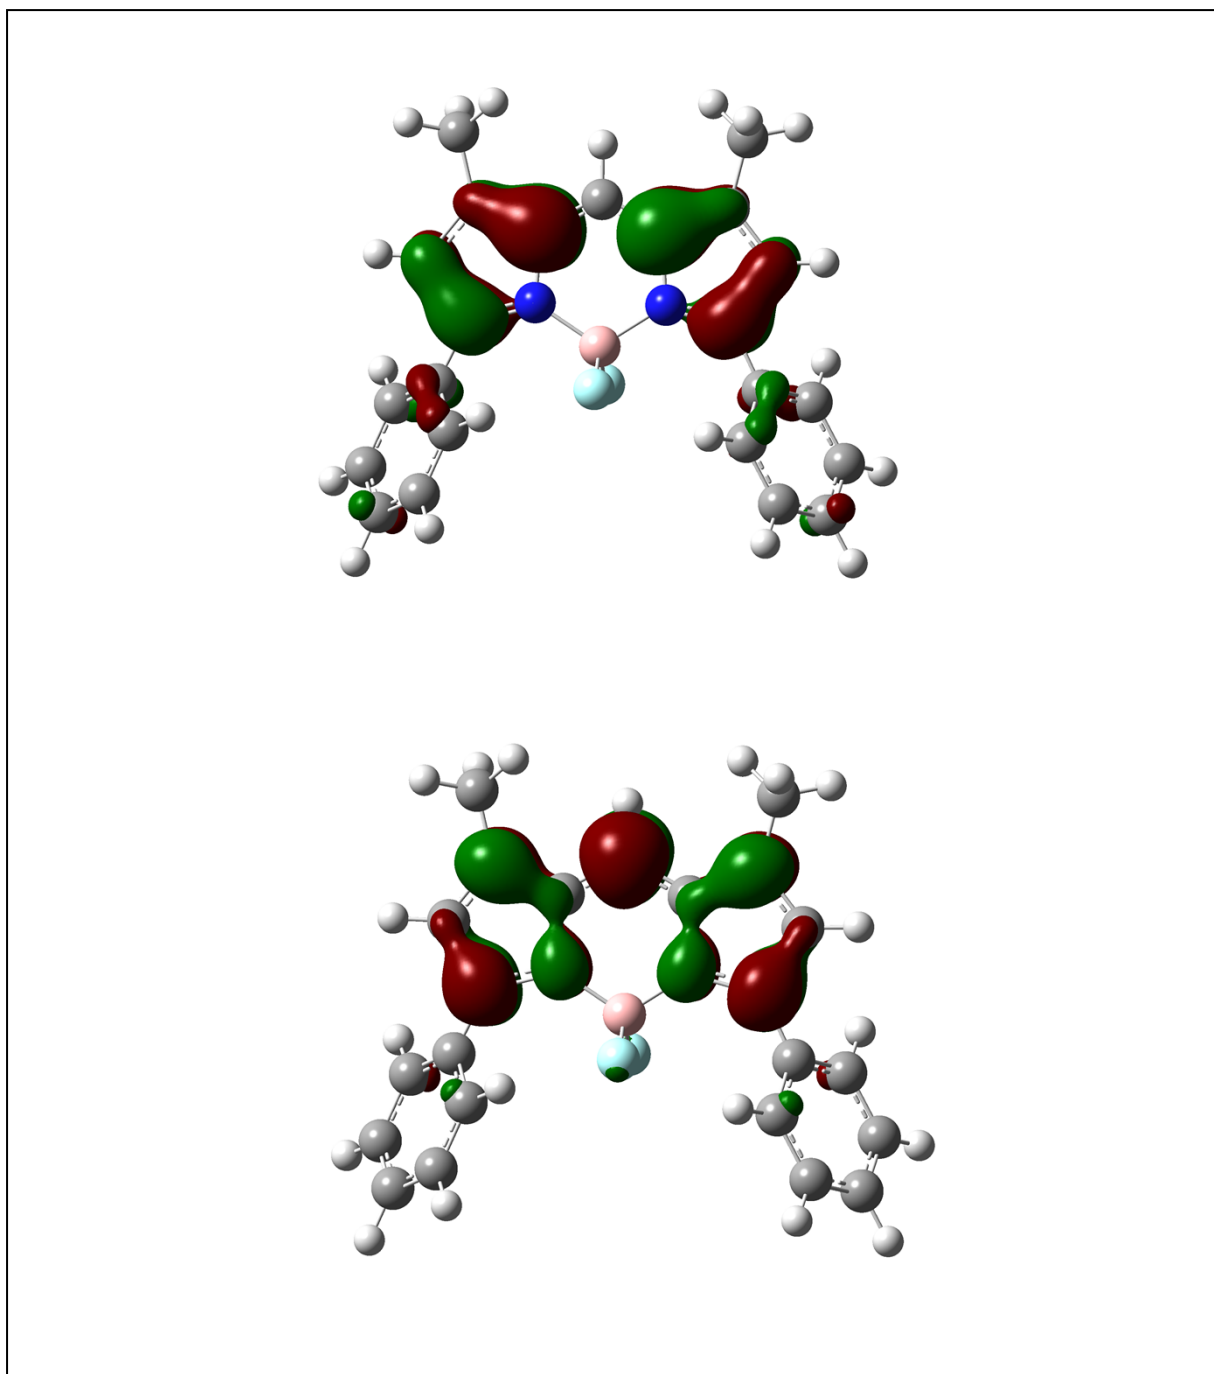

**Figure S6b.** Kohn-Sham representations of the HOMO (upper panel) and LUMO (lower panel) isodensity ( $\text{id} = 0.017$ ) distributions computed for CORE with the 3,5-aryl rings held at the optimized geometry.

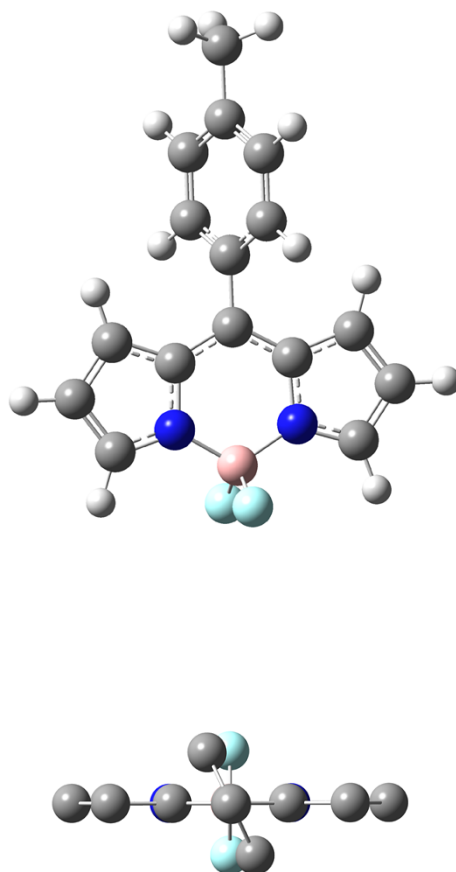

**Figure S7a.** Energy-minimized geometry computed for ROBOD (upper panel). The lower panel shows a projection looking from the methyl carbon atom of the meso-tolyl group down to the boron atom.

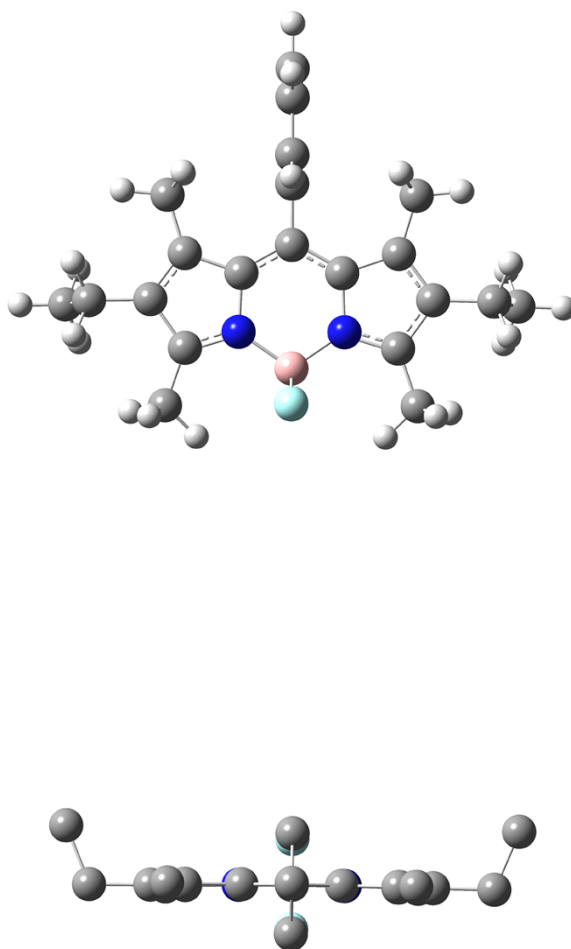

**Figure S7b.** Energy-minimized geometry computed for BOD (upper panel). The lower panel shows a projection looking from the para carbon atom of the meso-phenyl group down to the boron atom.

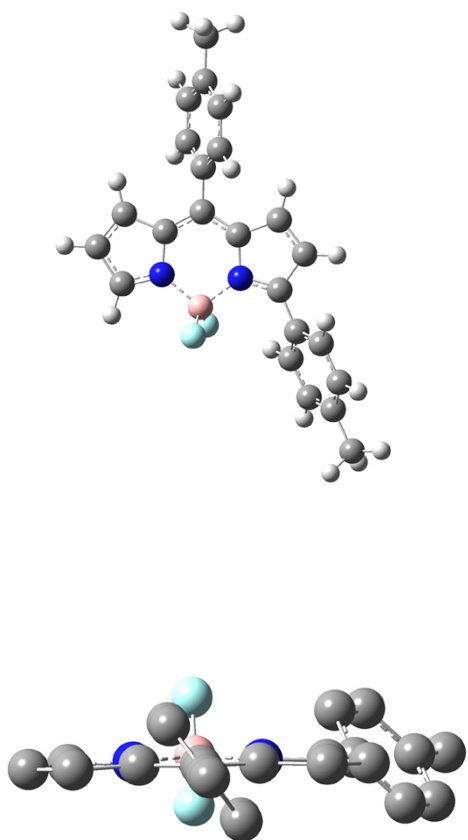

**Figure S7c.** Energy-minimized geometry computed for PHEN1 (upper panel). The lower panel shows a projection looking from the methyl carbon atom of the meso-tolyl group down to the boron atom.

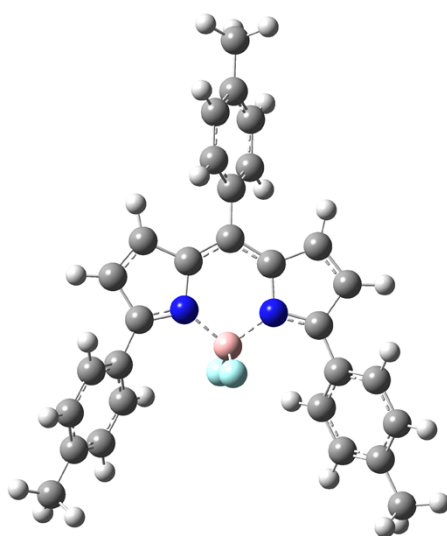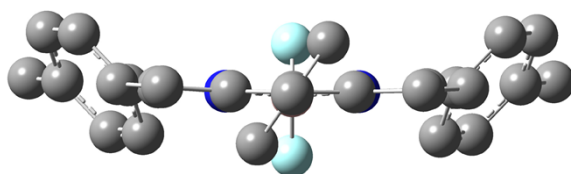

**Figure S7d.** Energy-minimized geometry computed for PHEN2 (upper panel). The lower panel shows a projection looking from the methyl carbon atom of the meso-tolyl group down to the boron atom.

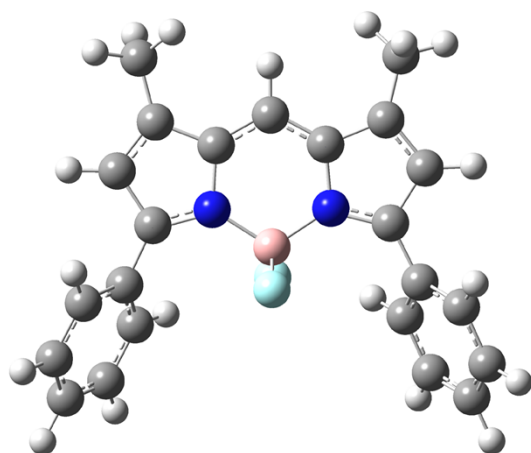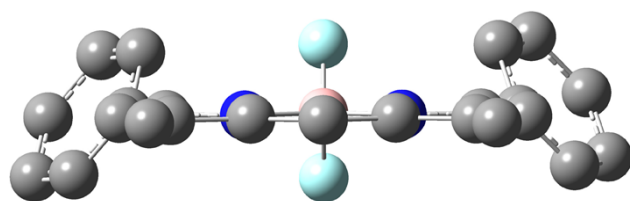

**Figure S7e.** Energy-minimized geometry computed for CORE (upper panel). The lower panel shows a projection looking from the methyl carbon atom of the meso-tolyl group down to the boron atom.



## EXPERIMENTAL DETAILS

### General methods for the synthesis and NMR characterization.

When needed, reactions were performed under a dry atmosphere of argon using standard Schlenk tube techniques.  $\text{CH}_2\text{Cl}_2$  was distilled from  $\text{P}_2\text{O}_5$  under an argon atmosphere.  $\text{CHCl}_3$  was neutralized on basic alumina prior to use.  $\text{Et}_2\text{O}$  and THF were distilled over sodium/benzophenone under an argon atmosphere. Toluene was distilled from sodium under an argon atmosphere. Triethylamine was distilled over KOH. Elementary magnesium was treated with 1M HCl, washed with water and intensively dried prior to use.  $^1\text{H}$  NMR,  $^{13}\text{C}$  NMR and  $^{11}\text{B}$  NMR spectra were recorded on BRUCKER Spectrometers and chemical shifts were reported to the delta scale in ppm relative to the residual peak of the deuterated used solvent:  $\text{CHCl}_3$  ( $\delta = 7.26$  ppm) or  $\text{CDHCl}_2$  ( $\delta = 5.32$  ppm) for  $^1\text{H}$  NMR, relative to  $\text{CDCl}_3$  ( $\delta = 77.16$  ppm) or  $\text{CD}_2\text{Cl}_2$  ( $\delta = 54.00$  ppm) for  $^{13}\text{C}$  NMR and were calibrated with the borosilicate of the NMR tubes for  $^{11}\text{B}$  NMR.

**General procedure for the Suzuki cross-coupling reaction.** A Schlenk tube was charged with a solution of appropriate iodo- and aryl- boronic acid or boronate derivatives in toluene. A mineral base ( $\text{K}_2\text{CO}_3$  or  $\text{Cs}_2\text{CO}_3$ ) was also added. The solution was degassed with argon for 30 minutes, then  $[\text{Pd}(\text{PPh}_4)_3]$  was added. The mixture was stirred at  $60^\circ\text{C}$  until complete consumption of the starting material (monitored by TLC). The solution was then extracted with toluene, washed with water, dried over  $\text{MgSO}_4$  and evaporated under vacuum. The residue was purified by column chromatography.

**PHEN1.** This compound was prepared according to the general procedure using 8-tolyl-3-bromo-BODIPY (167.0 mg, 0.462 mmol) in toluene (10 mL), *p*-tolylboronic acid (0.554 mmol, 75.0 mg), aqueous  $\text{K}_2\text{CO}_3$  (2.31 mmol, 319.0 mg), at  $110^\circ\text{C}$  during 15 min. The product was purified using a chromatography column packed with flash silica gel, using petroleum ether/ $\text{CH}_2\text{Cl}_2$  (6:4) as eluant. The pure product was recovered as a purple powder (100.0 mg, 58%).  $^1\text{H}$  NMR (200 MHz,  $\text{CDCl}_3$ ):  $\delta$  (ppm) = 7.79 (m, 1H), 7.57 (ABsyst., 4H,  $J_{\text{AB}} = 5.0$  Hz,  $\nu_0\delta = 117.3$  Hz), 7.38 (ABsyst., 4H,  $J_{\text{AB}} = 7.9$  Hz,  $\nu_0\delta = 28.1$  Hz), 7.79 (d, 1H,  $^3J = 4.4$  Hz), 6.83 (d, 1H,  $^3J = 4.0$  Hz), 6.66 (d, 1H,  $^3J = 4.4$  Hz), 6.50-6.47 (m, 1H), 2.46 (s, 3H), 2.47 (s, 3H).  $^{13}\text{C}$  NMR (75 MHz,  $(\text{CD}_3)_2\text{CO}$ )  $\delta$  (ppm) = 161.4, 146.5, 142.5, 141.9, 141.2, 138.0, 134.7, 133.9, 132.1, 131.6, 130.5, 130.4, 130.4, 130.3, 130.1, 129.9, 122.0, 118.8, 21.4.  $^{11}\text{B}$  NMR (128 MHz,  $\text{CDCl}_3$ )  $\delta$  (ppm) = 0.86 (t,  $^1J = 94$  Hz). UV-Vis ( $\text{CH}_2\text{Cl}_2$ )  $\lambda$

nm ( $\epsilon$ ,  $M^{-1}\cdot\text{cm}^{-1}$ ): 531 (59000) ; 370 (16000). EI,  $m/z$  (%): 372.1 (100). Anal. Calcd for  $C_{23}H_{19}BF_2N_2$ : C, 74.22; H, 5.15; N, 7.53. Found: C, 74.04; H, 4.89; N, 7.84.

**PHEN2.** This compound was prepared according to the general procedure from 8-tolyl-3,5-dibromoBODIPY (200.0 mg, 0.455 mmol) in toluene (15 mL), *p*-tolylboronic acid (0.955 mmol, 129.8 mg), aqueous  $K_2CO_3$  (2.27 mmol, 314.2mg), at 110°C during 1h. The product was purified using a chromatography column packed with flash silica gel, using petroleum ether / $CH_2Cl_2$  (7:3 to 6:4) as eluant. The pure product was recovered as a purple powder (151.6 mg, 72%).  $^1H$  NMR (200 MHz,  $CDCl_3$ ):  $\delta$  (ppm) = 7.70 (ABsyst., 8H,  $J_{AB}$  = 8.2 Hz,  $\nu_0\delta$  = 166.7 Hz), 7.41 (ABsyst., 4H,  $J_{AB}$  = 8.1 Hz,  $\nu_0\delta$  = 45.2 Hz), 6.89 (d, 2H,  $^3J$  = 4.4 Hz), 6.61 (d, 2H,  $^3J$  = 4.4 Hz), 2.48 (s, 3H), 2.39 (s, 6H).  $^{13}C$  NMR (75 MHz,  $CDCl_3$ ):  $\delta$  (ppm) = 158.7, 143.7, 140.4, 139.6, 136.3, 131.7, 130.6, 129.9, 129.4, 129.4, 129.0, 128.9, 120.6, 21.5.  $^{11}B$  NMR (128 MHz,  $CDCl_3$ )  $\delta$  (ppm) = 1.49 (t,  $^1J$  = 100 Hz). EI,  $m/z$  (%): 462.1 (100). Anal. Calcd for  $C_{30}H_{25}BF_2N_2$ : C, 77.93; H, 54.45; N, 6.06. Found: C, 77.82; H, 5.26; N, 5.75.

**CORE.** To a degassed solution of 4-methyl-2-phenyl-*1H*-pyrrole (373.7 mg, 2.38 mmol, 2 equiv) in  $CH_2Cl_2$  (30 mL) were successively added triethyl orthoformate (3 mL, 18.04 mmol, 15 equiv) and trifluoroacetic acid (0.55 mL, 7.19 mmol, 6 equiv). The solution was stirred at rt for 4h, then was concentrated and the excess of triethyl orthoformate was removed under vacuum. The purple residue was solubilized in  $CH_2Cl_2$  (30 mL) under argon,  $iPr_2NH$  (1 mL, 7.14 mmol, 6 equiv) was first added, giving a pink solution; then  $BF_3\cdot OEt_2$  (1.17 mL, 9.48 mmol, 8 equiv) was finally added. The purple solution was stirred at room temperature for 16 h, then poured into a saturated solution of  $NaHCO_3$  and stirred further for 2 h. The reaction medium was washed with  $H_2O$ , dried with brine and over  $Na_2SO_4$ . Purification by column chromatography ( $SiO_2$ ,  $CH_2Cl_2$ /petroleum ether (gradient from 50/50 to 100/0), then crystallization from  $CH_2Cl_2$ /EtOH gave dark green metallic needles (308.6 mg, 70%).  $^1H$  NMR, 400 MHz,  $CD_2Cl_2$ ,  $\delta$  (ppm): 2.39 (s, 6H); 6.47 (s, 2H); 7.39 (s, 1H); 7.42-7.45 (m, 6H); 7.82-7.84 (m, 4H).  $^{13}C$  NMR, 100 MHz,  $CD_2Cl_2$ ,  $\delta$  (ppm): 11.1; 120.5; 122.0; 128.1; 129.3 (t,  $J_{C-F}$  = 3.9 Hz); 129.4; 132.7; 135.3; 141.9; 157.8.  $^{11}B$  NMR, 128 MHz,  $CD_2Cl_2$ ,  $\delta$  (ppm): 1.33 (t, 1B,  $J$  = 32.1Hz). IR: ( $cm^{-1}$ ): 3096; 3039; 2924; 1607; 1592; 1515; 1489; 1454; 1393; 1220; 1192; 1150; 1031; 994; 952; 807; 764; 725; 694; 679. Mp = 217.1-217.5 °C. EI ( $m/z$ , relative intensity): theoretical mass 372.2 (100), 373.2 (25.6); found 372.1 (100). Anal. calcd for  $C_{23}H_{19}BF_2N_2$  ( $M_r$  = 372.22): C, 74.22; H, 5.15; N, 7.53. Anal. found: C, 74.14; H, 5.09; N, 7.47.

## Spectroscopic investigations.

Absorption spectra were recorded with a Hitachi U3310 spectrophotometer and luminescence spectra were recorded with a fully-corrected Jobin-Yvon Fluorolog tau-3 spectrophotometer. Emission spectra were recorded for optically dilute solutions after purging with N<sub>2</sub>. Luminescence quantum yields were determined<sup>S1</sup> relative to Cresyl Violet ( $\Phi_F = 0.54$ )<sup>S2</sup> in methanol, fluorescein ( $\Phi_F = 0.95$ )<sup>S3</sup> in 0.1M NaOH or Nile Blue ( $\Phi_F = 0.27$ )<sup>S4</sup> in ethanol. Emission lifetimes were measured at room temperature by time-correlated, single photon counting using a picosecond laser diode (fwhm = 60 ps) as excitation source. Emission was isolated from scattered laser light with a narrow bandpass filter and detected with a microchannel plate photocell. After deconvolution of the instrument response function, the time resolution of this set-up was *ca.* 40 ps. Temperature dependence studies were made with an Oxford Instruments Optistat DN. All samples were purged thoroughly with N<sub>2</sub> before being sealed into optical cuvettes. Corrections for contraction of the solvent were made on the basis of literature precedents.<sup>S5</sup>

## Quantum chemical calculations

Semi-empirical calculations were performed with the PM6 parameterization<sup>S6</sup> within in the framework of the AMPAC<sup>S7</sup> 10.1 program package. Calculations were made for energy-minimized structures at the restricted Hartree-Fock (RHF) level with the solute embedded in a solvent reservoir of dielectric constant 10 using the COSMO<sup>S8</sup> model. Stationary points on the reaction potential energy surface were determined without geometrical constraints using the FULLCHN protocol to obtain first approximations. Further refinement was achieved using the eigenvector following procedure. All stationary points were verified as being genuine transition states by calculation of vibrational frequencies. Rotational barriers were computed by systematic variation of the respective dihedral angles from those of the energy-minimized structures with single-point (PM6, RHF, COMO) calculation of the energy. This approach assumes a rigid geometry for the dipyrin backbone. Refined calculations were made using FULLCHN where the entire molecule was allowed to undergo structural deformation in order to accommodate full rotation of the *meso*-aryl ring.

The *ab initio* calculations were carried out with the Gaussian 09<sup>S9</sup> program package. For the DFT calculations, Becke's three-parameter (B3) gradient-corrected exchange functional<sup>S10</sup> combined with the Lee-Yang-Parr (LYP) correlation functional<sup>S11</sup> was used.

Ground-state structures were computed with the RHF method used in conjunction with the 6-31G\*\* basis set and with the PCM model<sup>S12</sup> for the surrounding solvent reservoir. The geometries of the relevant excited states were optimized by the restricted single-excited configuration interaction approach (CIS) within the Hartree-Fock (HF) approximation.<sup>S13</sup>

## References

- S1. A. M. Brouwer, Standards for photoluminescence quantum yield measurements in solution. *Pure Appl. Chem.* **2011**, *83*, 2213-2228.
- S2. D. Magde, J. H. Brannon, T. L. Cremers and J. Olmsted III, Absolute luminescence yield of Cresyl Violet. A standard for the red. *J. Phys. Chem.* **1979**, *83*, 696-699.
- S3. J. H. Brannon and D. Magde, Absolute quantum yield determination by thermal blooming. Fluorescein. *J. Phys. Chem.* **1978**, *82*, 705-709.
- S4. R. Sens and K. H. Drexhage, Fluorescence quantum yields of Oxazine and Carbazine laser dyes. *J. Lumin.* **1981**, *24-25*, 709-712.
- S5. P. D. Zoon and A. M. Brouwer, A Push-Pull Aromatic Chromophore with a touch of merocyanine. *Photochem. Photobiol. Sci.* **2009**, *8*, 345-353.
- S6. J. J. P. Stewart, Optimization of parameters for semi-empirical methods. V: Modification of NDDO approximations and applications to 70 elements. *J. Mol. Model.* **2007**, *13*, 1173-1213.
- S7. **AMPAC 10**, 1992-2013 Semichem, Inc. 12456 W 62nd Terrace - Suite D, Shawnee, KS 66216.
- S8. A. Klamt, Calculation of UV/Vis spectra in solution. *J. Phys. Chem.* **1996**, *100*, 3349-3353.
- S9. Gaussian 09, Revision D.01, M. J. Frisch, G. W. Trucks, H. B. Schlegel, G. E. Scuseria, M. A. Robb, J. R. Cheeseman, G. Scalmani, V. Barone, B. Mennucci, G. A. Petersson, H. Nakatsuji, M. Caricato, X. Li, H. P. Hratchian, A. F. Izmaylov, J. Bloino, G. Zheng, J. L. Sonnenberg, M. Hada, M. Ehara, K. Toyota, R. Fukuda, J. Hasegawa, M. Ishida, T. Nakajima, Y. Honda, O. Kitao, H. Nakai, T. Vreven, J. A. Montgomery Jr., J. E. Peralta, F. Ogliaro, M. Bearpark, J. J. Heyd, E. Brothers, K. N. Kudin, V. N. Staroverov, R. Kobayashi, J. Normand, K. Raghavachari, A. Rendell, J. C. Burant, S. S. Iyengar, J. Tomasi, M. Cossi, N. Rega, N. J. Millam, M. Klene, J. E. Knox, J. B. Cross,

- V. Bakken, C. Adamo, J. Jaramillo, R. Gomperts, R. E. Stratmann, O. Yazyev, A. J. Austin, R. Cammi, C. Pomelli, J. W. Ochterski, R. L. Martin, K. Morokuma, V. G. Zakrzewski, G. A. Voth, P. Salvador, J. J. Dannenberg, S. Dapprich, A. D. Daniels, Ö. Farkas, J. B. Foresman, J. V. Ortiz, J. Cioslowski and D. J. Fox, Gaussian, Inc., Wallingford CT, 2009.
- S10. A. D. Becke, Density functional thermochemistry. III The role of exact exchange. *J. Chem. Phys.* **1993**, *98*, 5648-5652.
- S11. C. Lee, W. Yang and R. G. Parr, Development of the Colle-Salvetti correlation energy formula into a functional of the electron density. *Phys. Rev. B* **1988**, *37*, 785-789.
- S12. B. Mennucci, C. Cappelli, C. A. Guido, R. Cammi and J. Tomasi, Structures and properties of electronically excited state chromophores in solution from the Polarizable Continuum Model coupled to the TD-DFT. *J. Phys. Chem. A* **2009**, *113*, 3009-3200.
- S13. J. B. Foresman, M. Head-Gordon, J. A. Pople and M. J. Frish, Toward a systematic molecular orbital theory for excited states. *J. Phys. Chem.* **1992**, *96*, 135.
